# Supplementary material for: Phase Change Ge-Rich Ge–Sb–Te/Sb2Te3 Core-Shell Nanowires by Metal Organic Chemical Vapor Deposition
Source: MDPI journal article supplement (doi:10.3390/nano11123358), 2021-12-10
Supplement: s1 [file s1]

Supplementary Materials

# Phase Change Ge-Rich Ge–Sb–Te/Sb<sub>2</sub>Te<sub>3</sub> Core-Shell Nanowires by Metal Organic Chemical Vapor Deposition

Arun Kumar <sup>1</sup>, Raimondo Cecchini <sup>2</sup>, Claudia Wiemer <sup>1</sup>, Valentina Mussi <sup>3</sup>, Sara De Simone <sup>3</sup>, Raffaella Calarco <sup>3</sup>, Mario Scuderi <sup>4</sup>, Giuseppe Nicotra <sup>4</sup> and Massimo Longo <sup>3,\*</sup>

<sup>1</sup> CNR—Institute for Microelectronics and Microsystems, Via C. Olivetti 2, 20864 Agrate Brianza, Italy; arun.kumar@mdm.imm.cnr.it (A.K.); claudia.wiemer@mdm.imm.cnr.it (C.W.)

<sup>2</sup> CNR—Institute for Microelectronics and Microsystems, Via Gobetti 101, 40129 Bologna, Italy; cecchini@bo.imm.cnr.it

<sup>3</sup> CNR—Institute for Microelectronics and Microsystems, Via del Fosso del Cavaliere 100, 00133 Rome, Italy; valentina.mussi@artov.imm.cnr.it (V.M.); sara.desimone@artov.imm.cnr.it (S.D.S.); raffaella.calarco@artov.imm.cnr.it (R.C.)

<sup>4</sup> CNR—Institute for Microelectronics and Microsystems, Strada VIII 5, 95121 Catania, Italy; mario.scuderi@imm.cnr.it (M.S.); giuseppe.nicotra@imm.cnr.it (G.N.)

\* Correspondence: massimo.longo@artov.imm.cnr.it

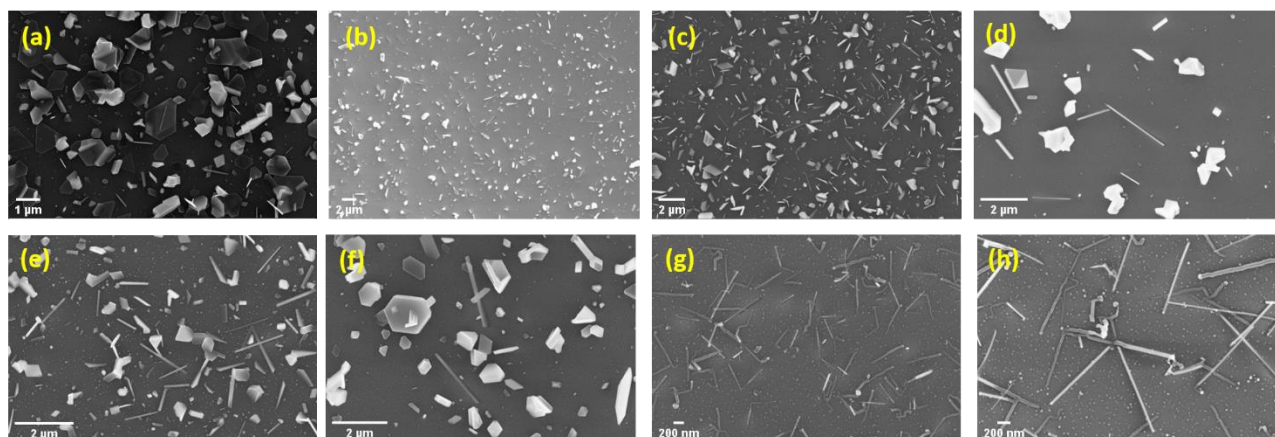

**Figure S1.** Plan view SEM images on MOCVD growth of Ge–Sb–Te alloy with 10 nm Au NP on SiO<sub>2</sub>/Si substrates with the growth parameters mentioned in Table S1, respectively.

**Table S1.** Growth parameters corresponding to Figure S1.

| Figure S1 | Growth Parameters |                 |            |                                  |                                             |                                 |
|-----------|-------------------|-----------------|------------|----------------------------------|---------------------------------------------|---------------------------------|
|           | Temperature (°C)  | Pressure (mbar) | Time (min) | TDMAGe (Partial Pressure) (mbar) | SbCl <sub>3</sub> (Partial Pressure) (mbar) | DSMTe (Partial Pressure) (mbar) |
| (a)       | 325               | 100             | 120        | $3.91 \times 10^{-3}$            | $6.04 \times 10^{-3}$                       | $8.81 \times 10^{-3}$           |
| (b)       | 370               | 100             | 120        | $7.83 \times 10^{-3}$            | $2.42 \times 10^{-3}$                       | $3.52 \times 10^{-3}$           |
| (c)       | 400               | 50              | 120        | $2.94 \times 10^{-3}$            | $2.42 \times 10^{-3}$                       | $3.52 \times 10^{-3}$           |
| (d)       | 400               | 50              | 120        | $2.94 \times 10^{-3}$            | $1.21 \times 10^{-3}$                       | $8.81 \times 10^{-3}$           |
| (e)       | 375               | 100             | 120        | $1.17 \times 10^{-3}$            | $1.81 \times 10^{-3}$                       | $2.64 \times 10^{-3}$           |
| (f)       | 380               | 100             | 120        | $3.91 \times 10^{-3}$            | $1.51 \times 10^{-3}$                       | $2.11 \times 10^{-3}$           |
| (g)       | 380               | 300             | 120        | $4.77 \times 10^{-3}$            | $1.38 \times 10^{-3}$                       | $5.37 \times 10^{-3}$           |
| (h)       | 380               | 300             | 180        | $4.77 \times 10^{-3}$            | $1.38 \times 10^{-3}$                       | $5.37 \times 10^{-3}$           |

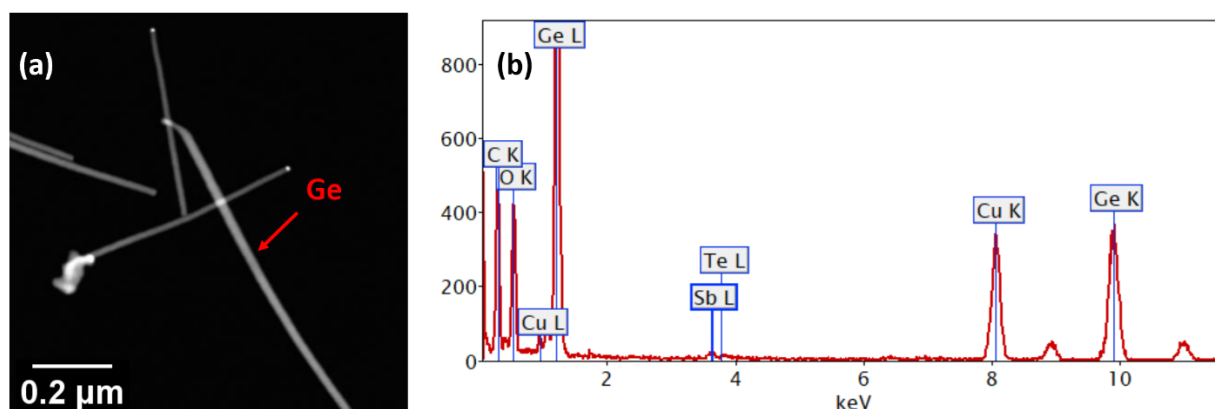

**Figure S2.** (a) STEM image of as grown Ge-Sb-Te with 10 nm Au NP on SiO<sub>2</sub>/Si substrates at T = 400 °C, P = 50 mbar, t = 120 min, TDMAGe partial pressure =  $2.94 \times 10^{-3}$  mbar, SbCl<sub>3</sub> partial pressure =  $2.42 \times 10^{-3}$  mbar, DSMTe partial pressure =  $3.52 \times 10^{-3}$  mbar, (b) the composition of the NWs resulted to be mainly that of Ge, as indicated by the EDX spectrum.

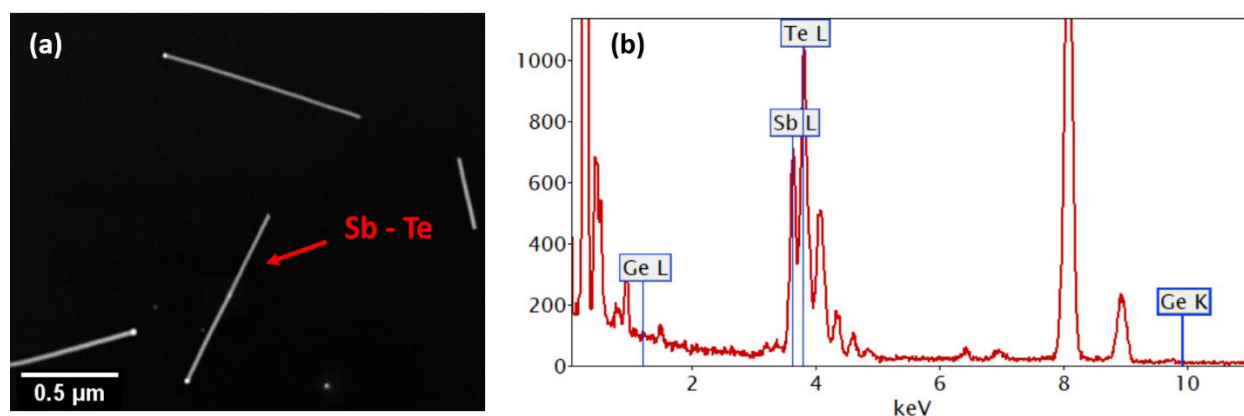

**Figure S3.** (a) STEM-EDX images showing the presence of NWs with 10 nm Au NP on SiO<sub>2</sub>/Si substrates at T = 380 °C, P = 300 mbar, t = 180 min, TDMAGe partial pressure =  $4.77 \times 10^{-3}$  mbar, SbCl<sub>3</sub> partial pressure =  $1.38 \times 10^{-3}$  mbar, DSMTe partial pressure =  $5.37 \times 10^{-3}$  mbar; (b) the composition of the NWs resulted to be mainly that of Sb<sub>2</sub>Te<sub>3</sub>, as indicated by the EDX spectrum.

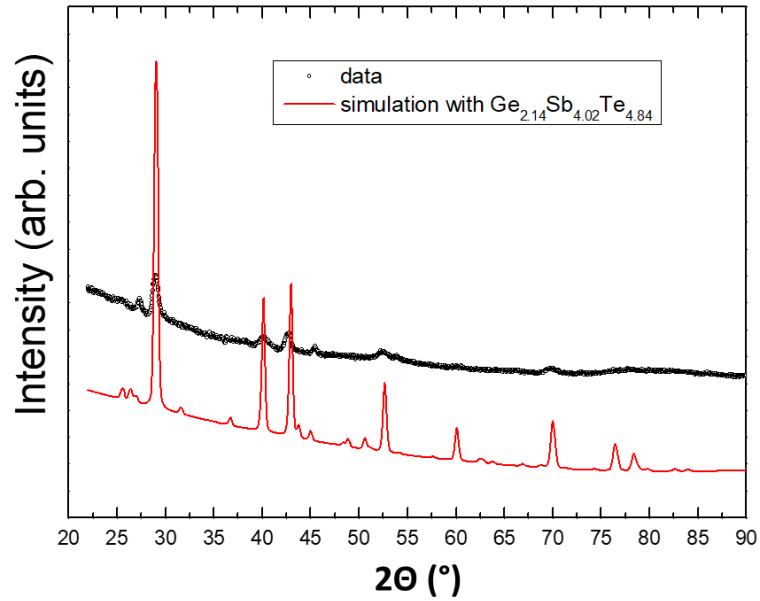

**Figure S4.** XRD analysis of NWs with 10 nm Au NP on SiO<sub>2</sub>/Si substrates at T = 380 °C, P = 300 mbar, t = 180 min, TDMAGE partial pressure =  $4.77 \times 10^{-3}$  mbar, SbCl<sub>3</sub> partial pressure =  $1.38 \times 10^{-3}$  mbar, DSMTe partial pressure =  $5.37 \times 10^{-3}$  mbar.

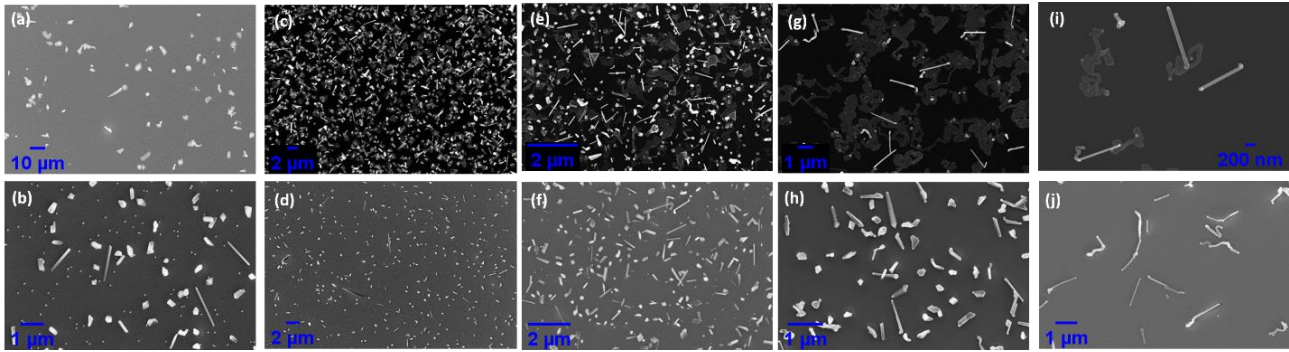

**Figure S5.** Plan view SEM images on MOCVD growth of Ge-Sb-Te nanowires with 50 nm Au NP on Si(100) and SiO<sub>2</sub>/Si substrates at T = 400 °C, P = 50 mbar, t = 60 min, TDMAGE partial pressure =  $3.35 \times 10^{-3}$  mbar, (a,b) SbCl<sub>3</sub> partial pressure =  $2.07 \times 10^{-3}$  mbar, DiPTe partial pressure =  $7.07 \times 10^{-3}$ , (c,d) SbCl<sub>3</sub> partial pressure =  $1.04 \times 10^{-3}$  mbar, DiPTe partial pressure =  $7.07 \times 10^{-3}$  mbar, (e,f) SbCl<sub>3</sub> partial pressure =  $3.45 \times 10^{-4}$  mbar, DiPTe partial pressure =  $7.07 \times 10^{-3}$  mbar, (g,h) SbCl<sub>3</sub> partial pressure =  $1.73 \times 10^{-4}$  mbar, DiPTe partial pressure =  $8.58 \times 10^{-3}$  mbar, (i,j) SbCl<sub>3</sub> partial pressure =  $5.18 \times 10^{-5}$  mbar, DiPTe partial pressure =  $8.58 \times 10^{-3}$  mbar, respectively.

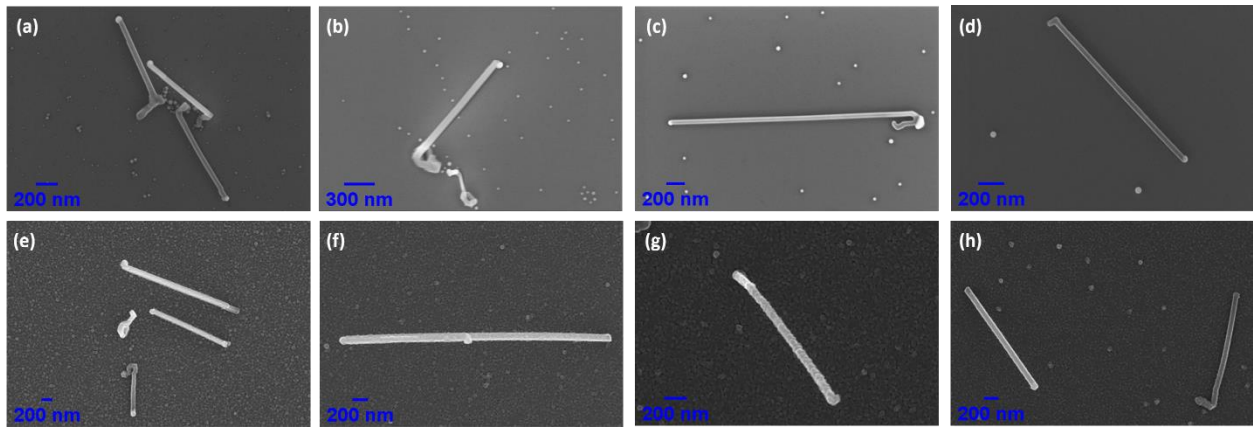

**Figure S6.** Plan view SEM images on MOCVD growth of (a–d) Ge-rich Ge–Sb–Te core nanowires, and (e–h) Ge-rich Ge–Sb–Te/Sb<sub>2</sub>Te<sub>3</sub> core-shell NWs with 10, 20, 30 and 50 nm Au NPs on SiO<sub>2</sub>/Si substrate, respectively.

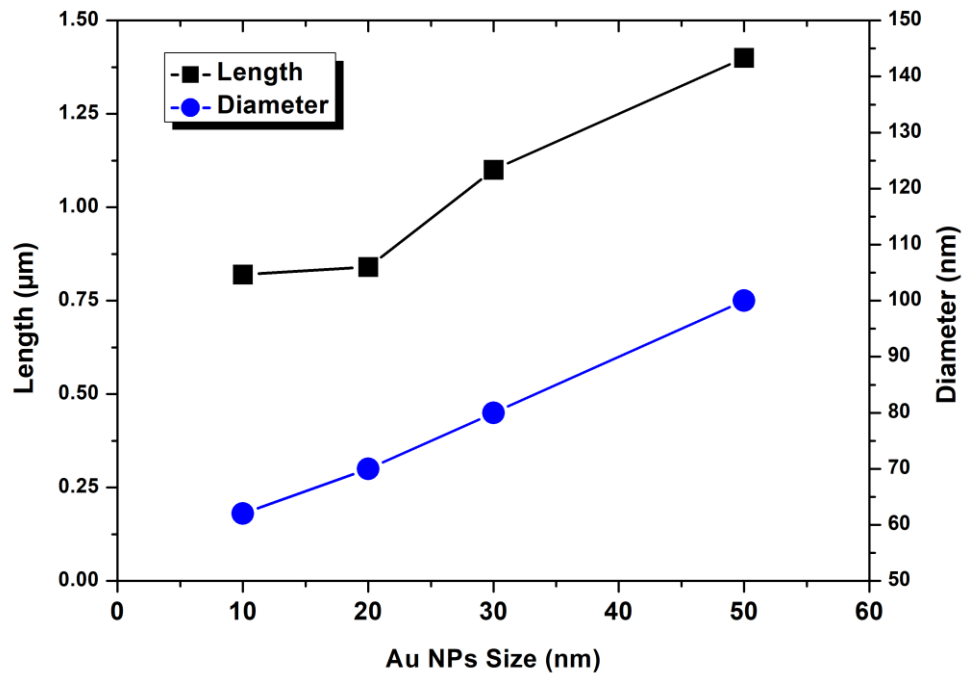

**Figure S7.** Statistical plot of the average length and diameter distribution of Ge-rich Ge–Sb–Te core nanowires on SiO<sub>2</sub>/Si with 10, 20, 30 and 50 nm Au NPs.

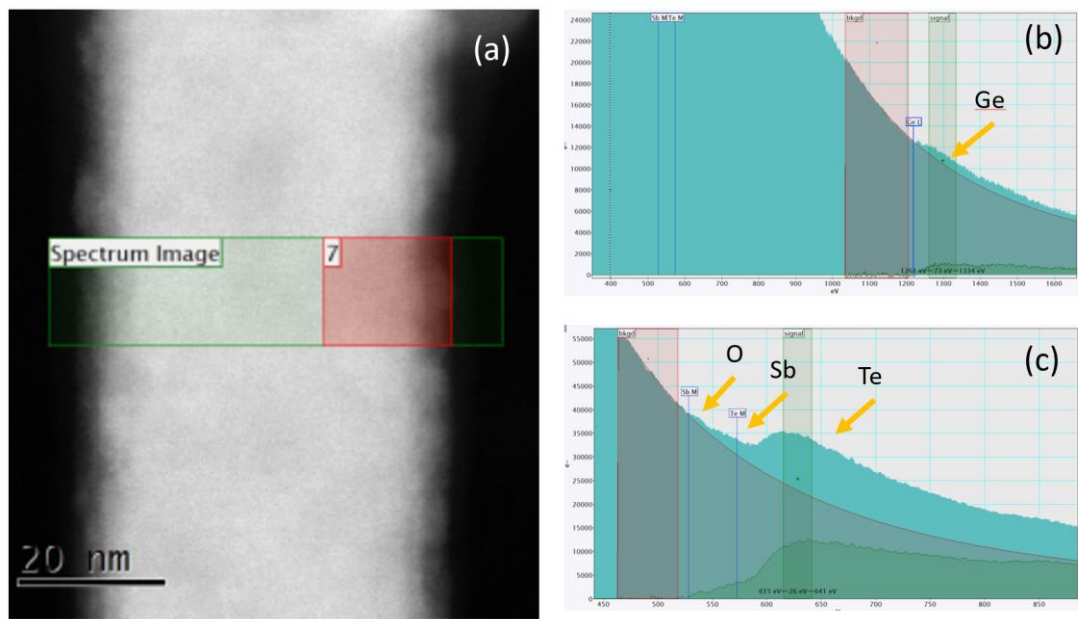

**Figure S8.** STEM image of a Ge-rich Ge-Sb-Te core nanowire portion (a) and its corresponding EELS spectra for Ge L-edge (b) and Sb-Te M-edge (c).

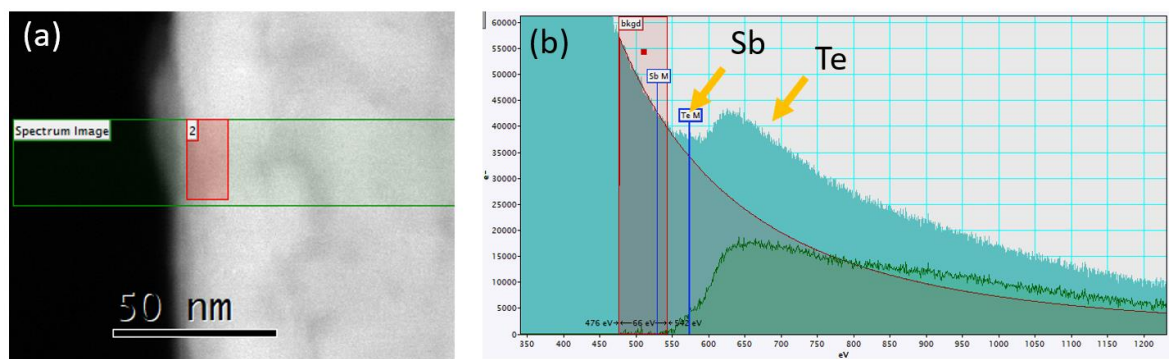

**Figure S9.** STEM image of a Ge-rich Ge-Sb-Te/Sb<sub>2</sub>Te<sub>3</sub> core-shell nanowire portion (a) and its corresponding EELS spectrum (b).
